# Supplementary material for: A Dansyl-Modified Sphingosine Kinase Inhibitor Dpf-543 Enhanced de Novo Ceramide Generation
Source: Preprints.org preprint supplement (doi:10.20944/preprints202108.0100.v1), 2021-08-04
Supplement: Supplementary file 1 [file supplementary]

**Supplementary Data**

Control

Control

Control

Control

**PF-543**

**DPF-543**

SPTLC1 53 kDa
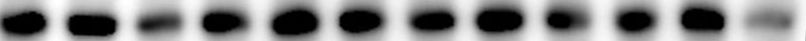


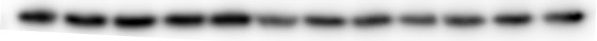
CerS4 45kDa


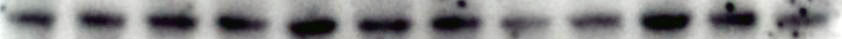

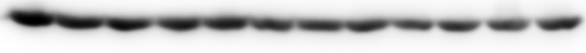
CerS6 45kDa

b-actin


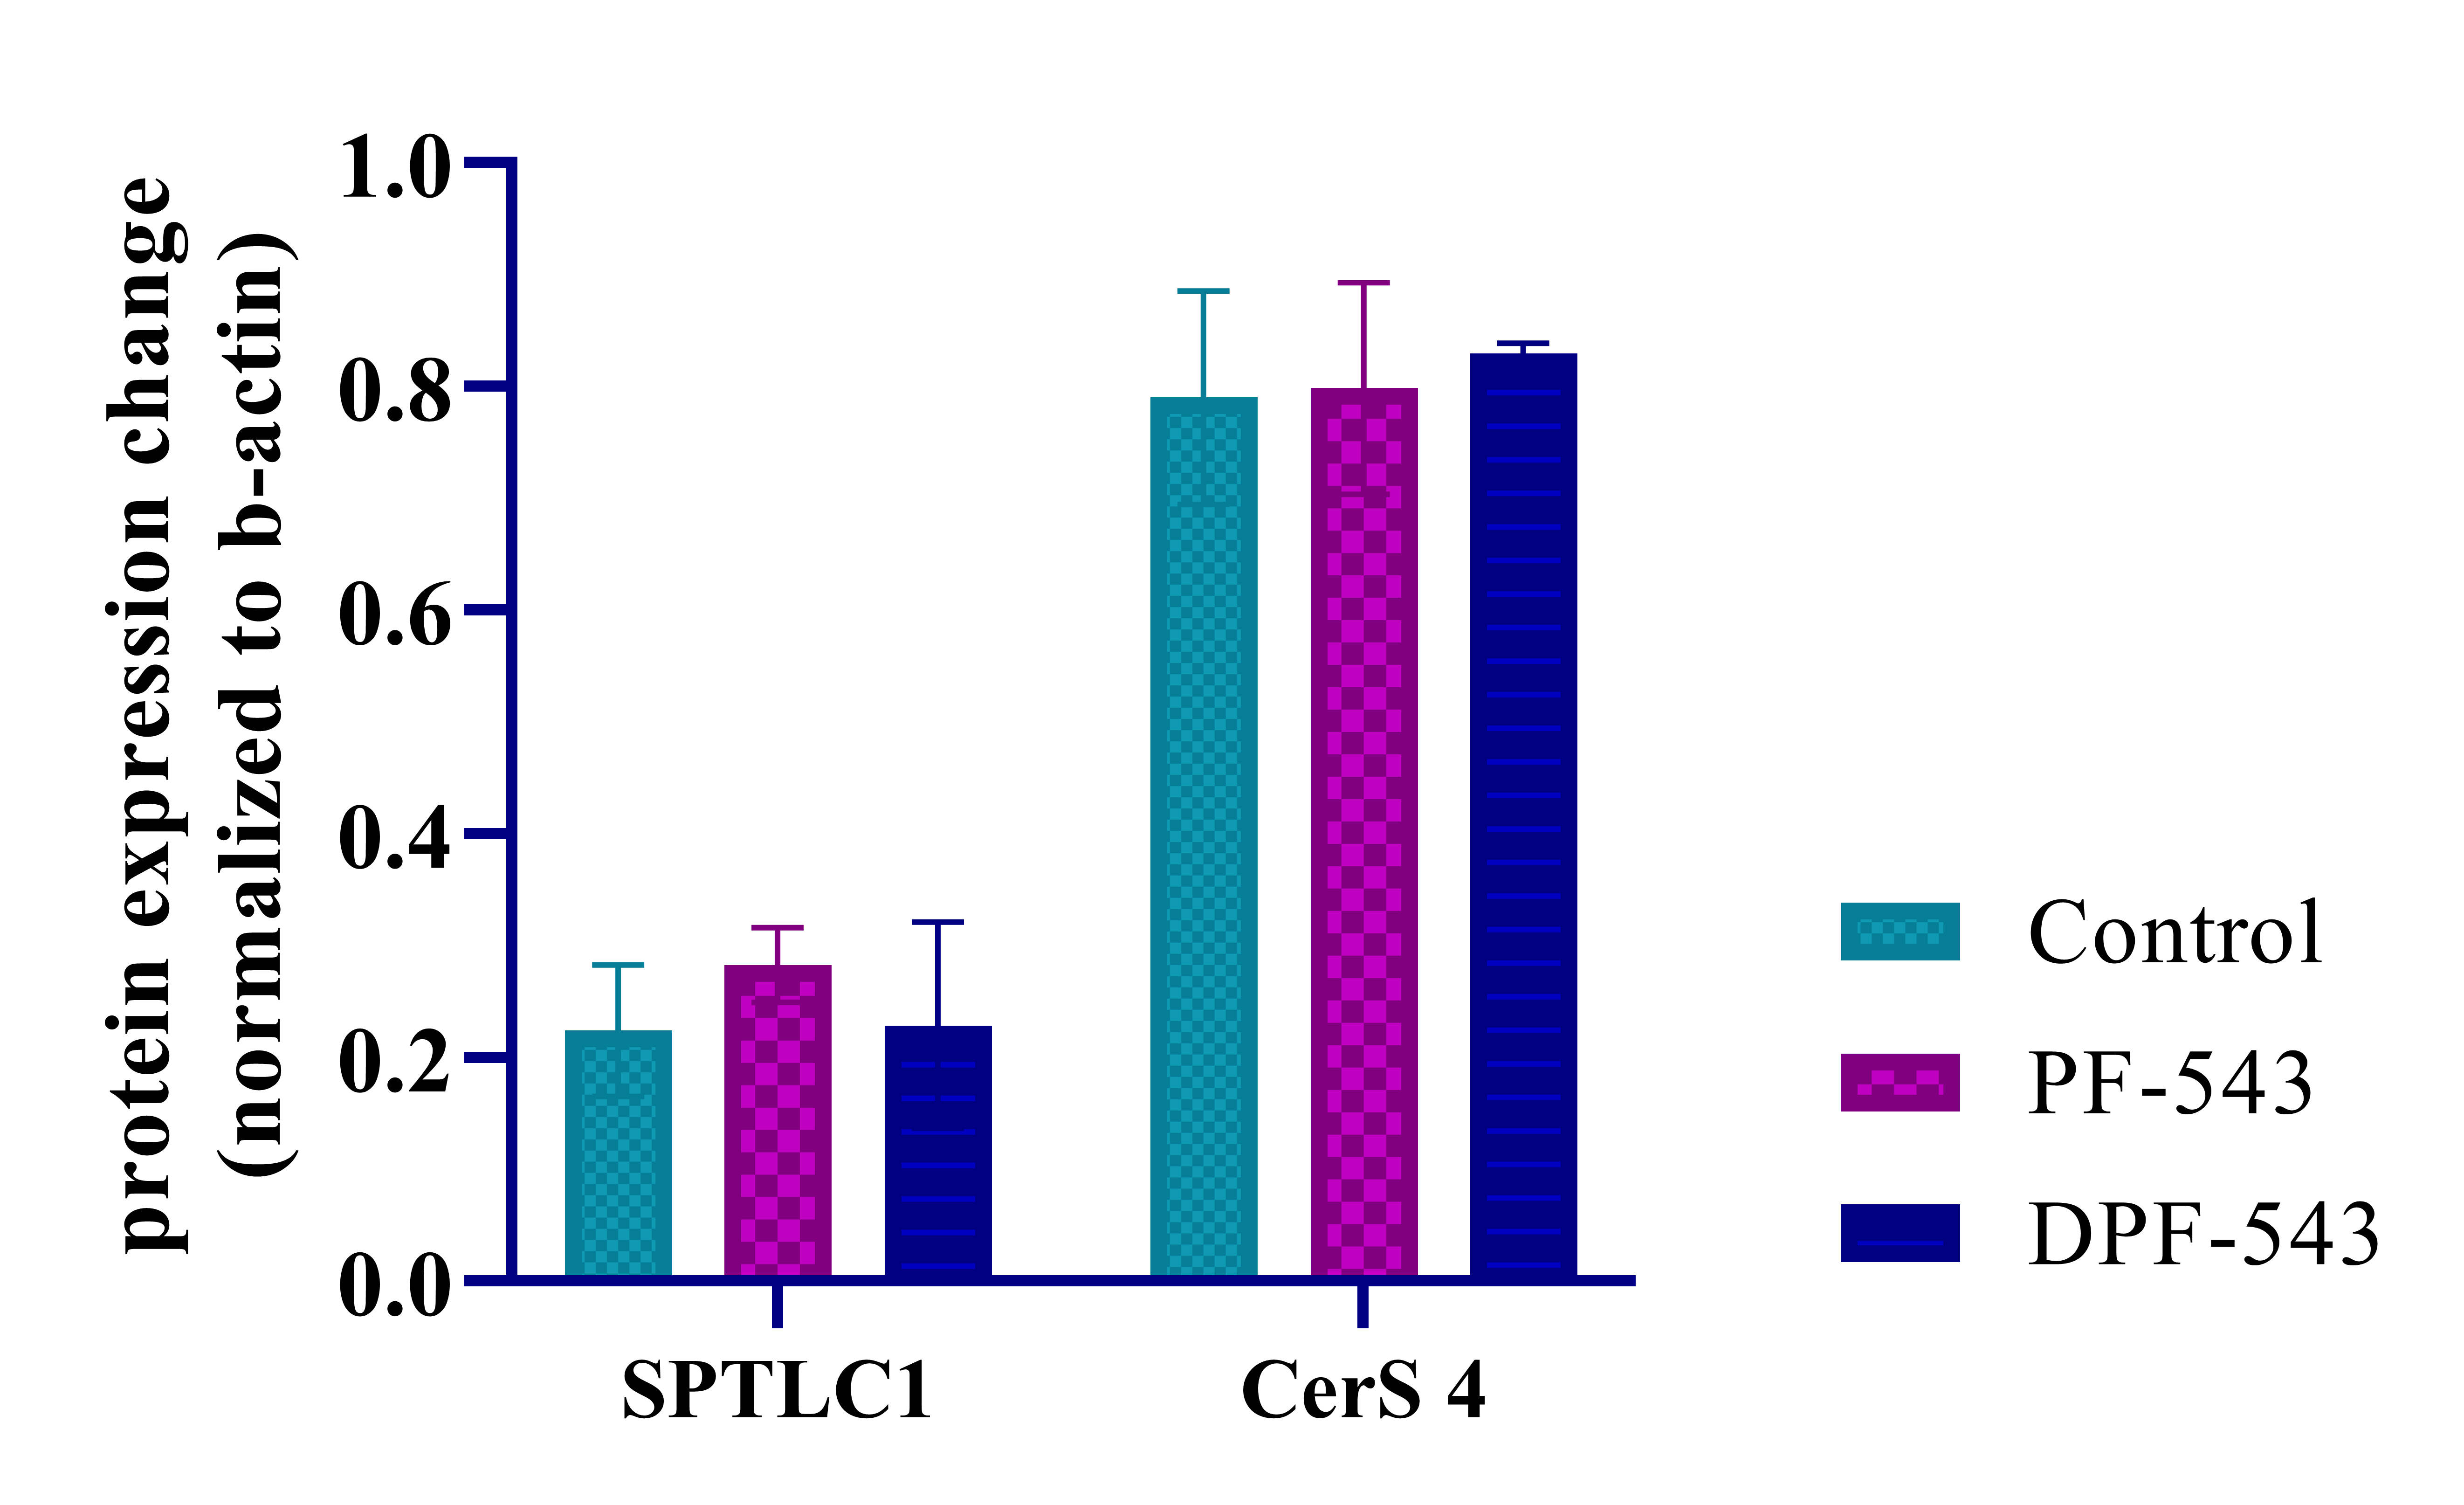


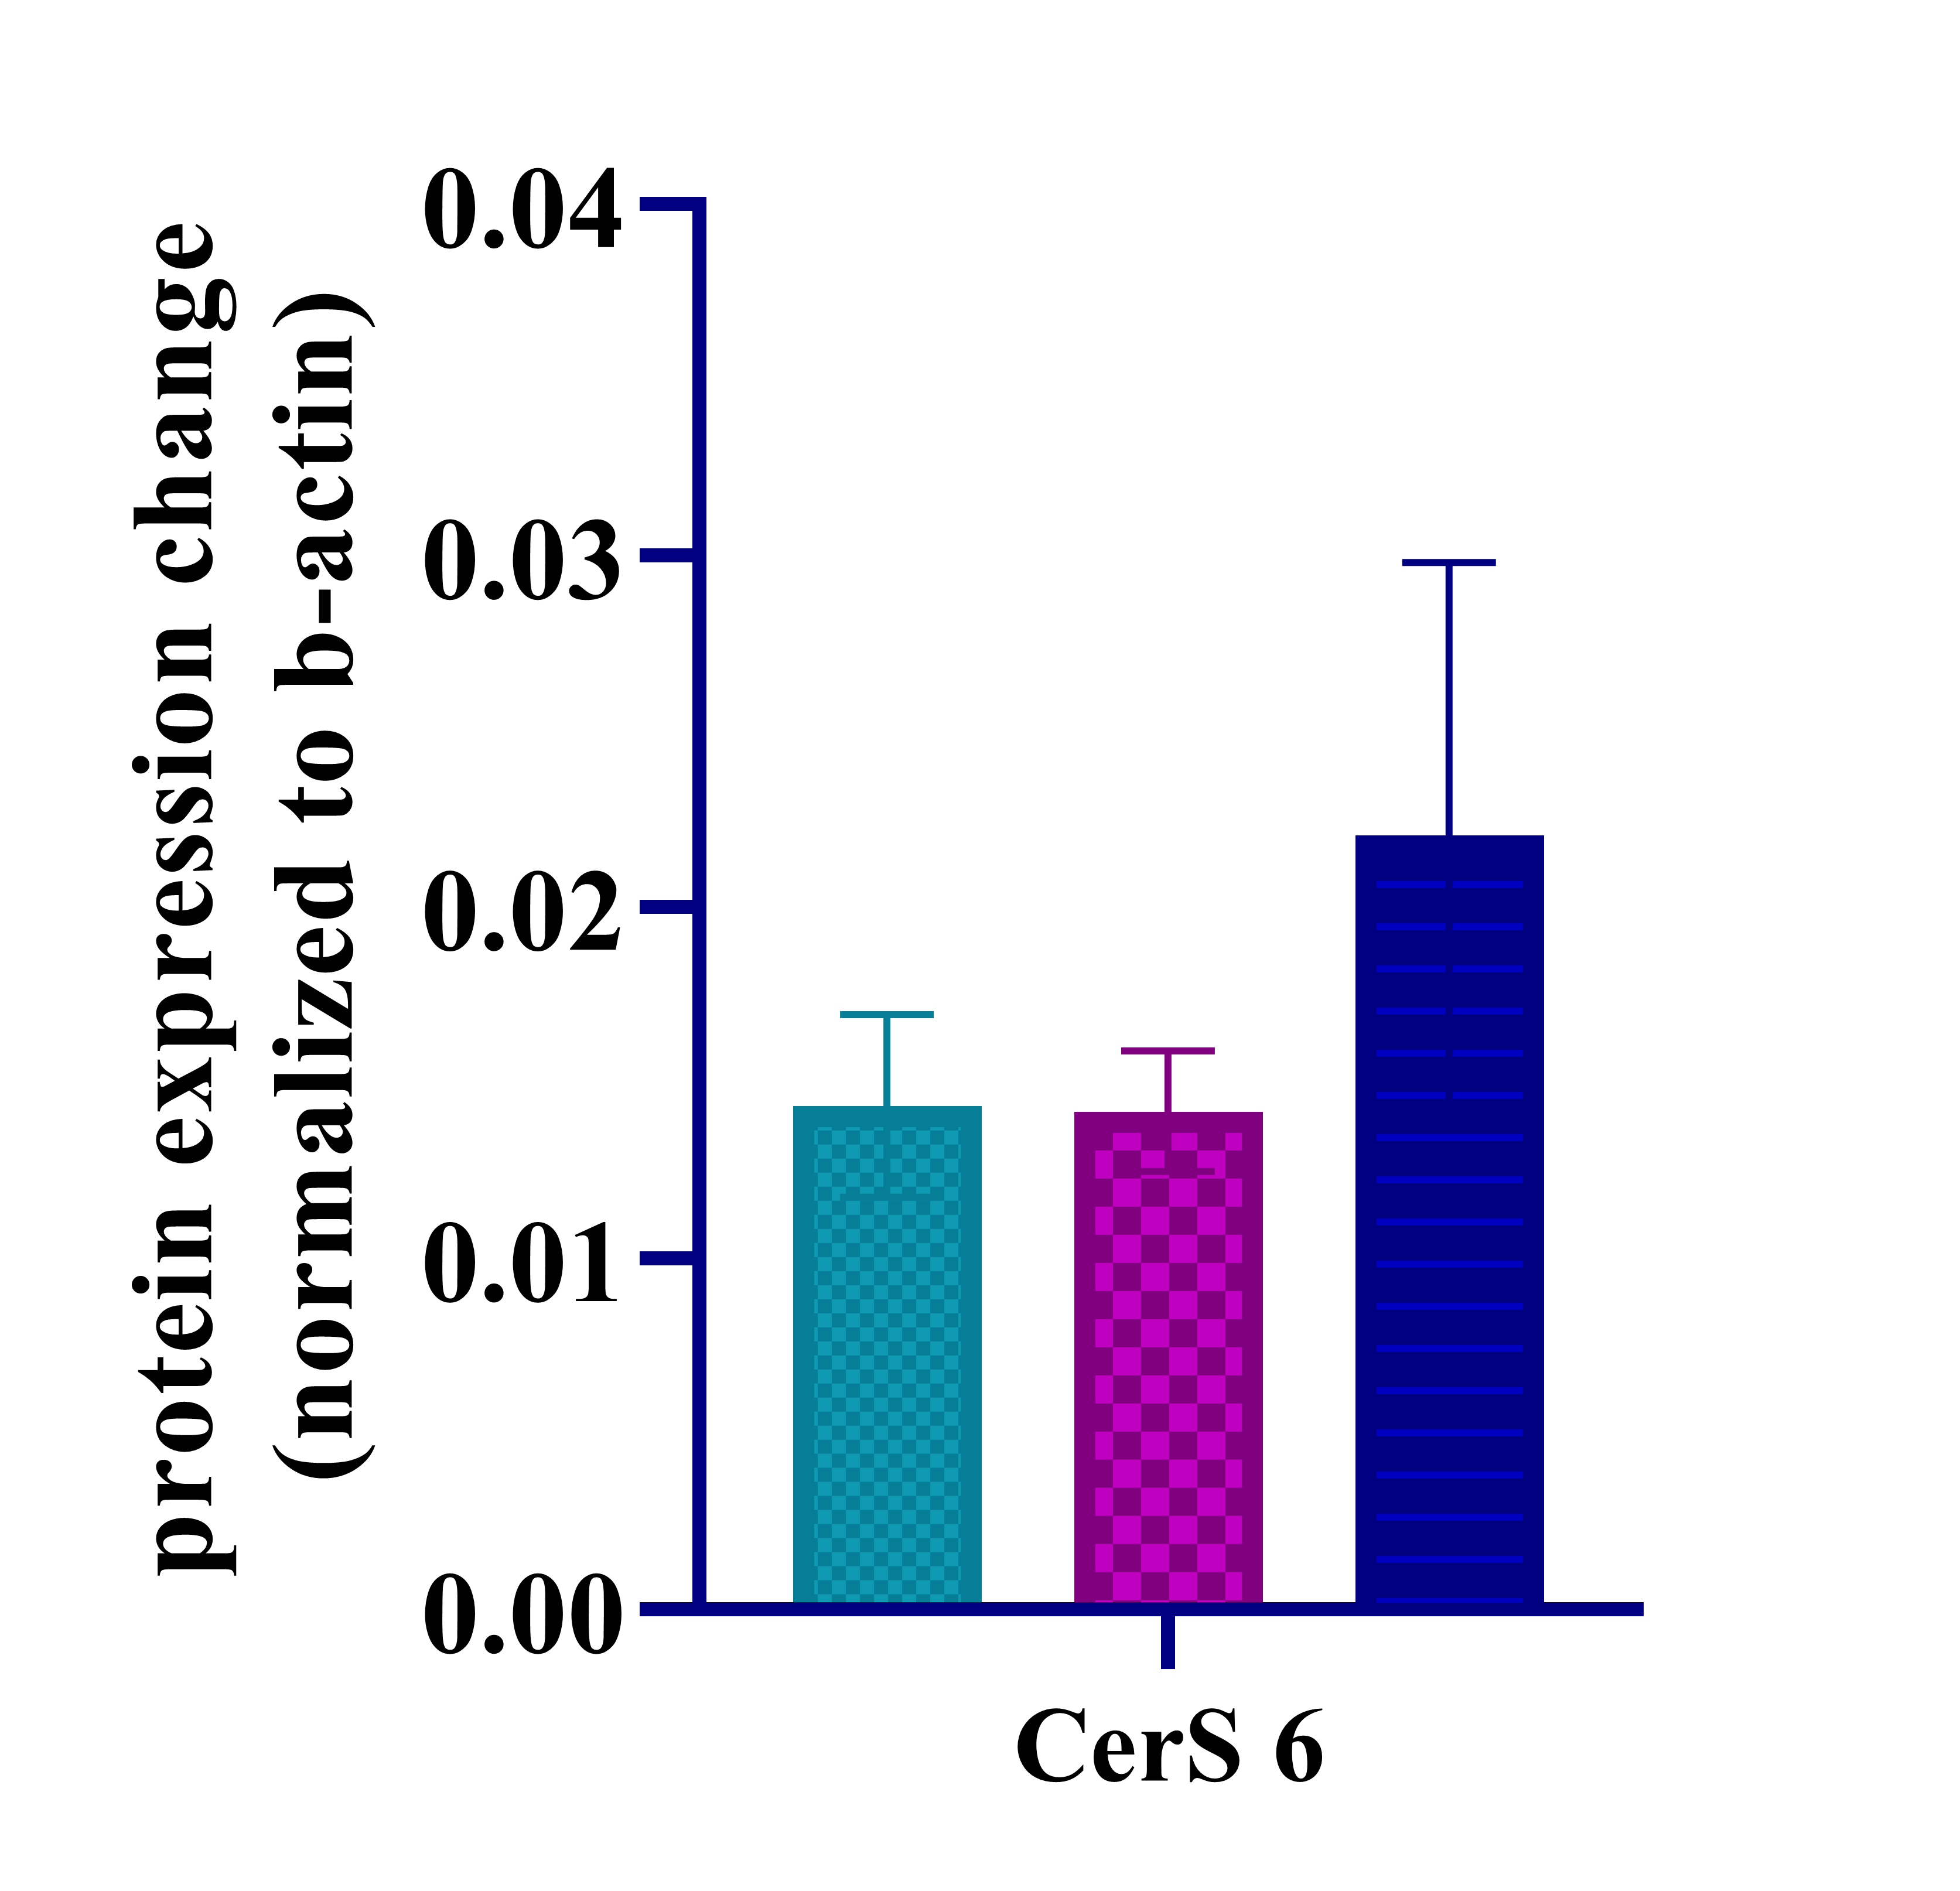


**Fig. S1**

**Table S1. QTRAP 4500 mass spectrometer setting for C18:1 Ceramide analysis**

| **ID** | **Q1 (Da)** | **Q3 (Da)** | **Dwell time (ms)** | **DP(volts)** | **EP(volts)** | **CE(volts)** | **CXP(volts)** |
| --- | --- | --- | --- | --- | --- | --- | --- |
| **Cer 16:0** | 538.3 | 264.3 | 50 | 40 | 5 | 35 | 15 |
| **Cer 17:0** | 552.2 | 264.3 | 50 | 50 | 5 | 35 | 8 |
| **Cer 18:1** | 564.3 | 264.3 | 50 | 50 | 5 | 35 | 15 |
| **Cer 18:0** | 566.3 | 264.3 | 50 | 50 | 5.5 | 35 | 10 |
| **Cer 20:0** | 594.3 | 264.3 | 50 | 55 | 5 | 35 | 15 |
| **Cer 24:1** | 648.4 | 264.3 | 50 | 55 | 6.25 | 35 | 15 |
| **Cer 24:0** | 650.4 | 264.3 | 50 | 55 | 6.25 | 35 | 15 |

**Table S2. QTRAP 4500 mass spectrometer setting for C17-DHCer and C17-Cer analysis**

| **ID** | **Q1 (Da)** | **Q3 (Da)** | **Dwell time (ms)** | **DP(volts)** | **EP(volts)** | **CE(volts)** | **CXP(volts)** |
| --- | --- | --- | --- | --- | --- | --- | --- |
| **Cer 16:0** | 524.3 | 250.3 | 50 | 40 | 5 | 35 | 15 |
| **Cer 17:0** | 552.2 | 264.3 | 50 | 50 | 5 | 35 | 8 |
| **Cer 18:1** | 550.4 | 250.3 | 50 | 50 | 5 | 35 | 15 |
| **Cer 18:0** | 552.4 | 250.3 | 50 | 50 | 5.5 | 35 | 10 |
| **Cer 20:0** | 580.4 | 250.3 | 50 | 55 | 5 | 35 | 15 |
| **Cer 22:0** | 608.6 | 250.3 | 50 | 55 | 5 | 35 | 15 |
| **Cer 24:1** | 634.4 | 250.3 | 50 | 55 | 6.25 | 35 | 15 |
| **Cer 24:0** | 636.4 | 250.3 | 50 | 55 | 6.25 | 35 | 15 |
| **DHCer 16:0** | 526.4 | 252.3 | 50 | 50 | 5.5 | 35 | 15 |
| **DHCer 18:1** | 550.4 | 252.3 | 50 | 50 | 5 | 35 | 14 |
| **DHCer 18:0** | 552.4 | 252.3 | 50 | 50 | 5 | 35 | 16 |
| **DHCer 20:0** | 582.4 | 252.3 | 50 | 50 | 5 | 35 | 15 |
| **DHCer 22:0** | 610.6 | 252.3 | 50 | 50 | 5 | 35 | 15 |
| **DHCer 24:1** | 636.4 | 252.3 | 50 | 50 | 6.5 | 35 | 15 |
| **DHCer 24:0** | 638.4 | 252.3 | 50 | 50 | 6.5 | 35 | 15 |

**Table S3. QTRAP 4500 mass spectrometer setting for labeled and endogenous sphingolipid analysis**

| **ID** | **Q1 (Da)** | **Q3 (Da)** | **Dwell time (ms)** | **DP(volts)** | **EP(volts)** | **CE(volts)** | **CXP(volts)** |
| --- | --- | --- | --- | --- | --- | --- | --- |
| **KDS-D2** | 302.2 | 272.3 | 150 | 35 | 5 | 35 | 15 |
| **SPA-D2** | 304.3 | 286.3 | 150 | 35 | 5 | 35 | 15 |
| **KDS** | 300.2 | 270.3 | 150 | 35 | 5 | 35 | 15 |
| **SPA** | 302.3 | 284.3 | 150 | 35 | 5 | 35 | 15 |
| **SPH** | 300.3 | 282.3 | 150 | 35 | 5 | 35 | 15 |
| **C17-SPH** | 286.3 | 268.3 | 150 | 35 | 5 | 35 | 15 |

**Table S4.** C17-DHCer conversion rate to C17-Cer in percentage

| **Groups/**  **Ceramides** | **C16:0** | **C18:1** | **C18:0** | **C20:0** | **C22:0** | **C24:1** | **C24:0** |
| --- | --- | --- | --- | --- | --- | --- | --- |
| **Control** | 0.78 | 0.018 | 0.47 | 7.7 | 53.1 | 43.8 | 27.5 |
| **PF-543** | 1.92 | 0.018 | 1.30 | 22 | 110.2 | 40.5 | 21.3 |
| **DPF-543** | 1.84 | 0.019 | 1.02 | 19.6 | 268.3 | 78.5 | 14.9 |
